# Supplementary material for: N-Acetyl Cysteine, Selenium, and Ascorbic Acid Rescue Diabetic Cardiac Hypertrophy via Mitochondrial-Associated Redox Regulators
Source: MDPI journal article supplement (doi:10.3390/molecules26237285), 2021-11-30
Supplement: s1 [file s1]

## Supplementary data

Iram Mushtaq <sup>1</sup>, Zainab Bashir <sup>1</sup>, Mehvish Sarwar <sup>1</sup>, Maria Arshad <sup>1</sup>, Ayesha Ishtiaq <sup>1</sup>, Wajiha Khan <sup>2</sup>, Uzma Khan <sup>3</sup>, Sobia Tabassum <sup>4</sup>, Tahir Ali <sup>1</sup>, Tahzeeb Fatima <sup>5</sup>, Hadi Valadi <sup>5</sup>, Muhammad Nawaz <sup>5,\*</sup> and Iram Murtaza <sup>1,\*</sup>

- <sup>1</sup> Signal transduction Laboratory, Department of Biochemistry, Faculty of Biological Sciences, Quaid-i-Azam University, Islamabad 45320, Pakistan. irammushtaq@bs.qau.edu.pk; zainabbashir23@gmail.com; mehwishmalik609@gmail.com; m.arshad@bs.qau.edu.pk; tahirali.bch@gmail.com; ayesha@bs.qau.edu.pk; irambch@qau.edu.pk
  - <sup>2</sup> Department of Biotechnology, COMSATS University Islamabad, Abbottabad Campus, Abbottabad 22060, Pakistan. wajihak@cuiatd.edu.pk
  - <sup>3</sup> Faculty of Biological Sciences, Hazara University, Mansehra 21040, Pakistan. uzmaqau2003@yahoo.com
  - <sup>4</sup> Department of Bioinformatics and Biotechnology, IIUI, Islamabad, 44000, Pakistan. sobia.tabassum@iiu.edu.pk.
  - <sup>5</sup> Department of Rheumatology and Inflammation Research, Institute of Medicine, Sahlgrenska Academy, University of Gothenburg, 413 46 Gothenburg, Sweden tahzeeb.fatima@gu.se ; hadi.valadi@gu.se ; muhammad.nawaz@gu.se
- \* Correspondence: muhammad.nawaz@gu.se (M.N.); irambch@qau.edu.pk (I.M.)

**Citation:** Mushtaq, I.; Bashir, Z.; Sarwar, M.; Arshad, M.; Ishtiaq, A.; Khan, W.; Khan, U.; Tabassum, S.; Ali, T.; Fatima, T.; et al. N-acetyl Cysteine, Selenium, and Ascorbic Acid Rescue Diabetic Cardiac Hypertrophy via Mitochondrial-Associated Redox Regulators. *Molecules* **2021**, *26*, 7285. <https://doi.org/10.3390/molecules26237285>

Academic Editor: Francesca Giampieri

Received: 26 October 2021  
Accepted: 29 November 2021  
Published: 30 November 2021

**Publisher's Note:** MDPI stays neutral with regard to jurisdictional claims in published maps and institutional affiliations.

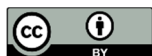

**Copyright:** © 2021 by the authors. Submitted for possible open access publication under the terms and conditions of the Creative Commons Attribution (CC BY) license (<http://creativecommons.org/licenses/by/4.0/>).

## Supplementary data

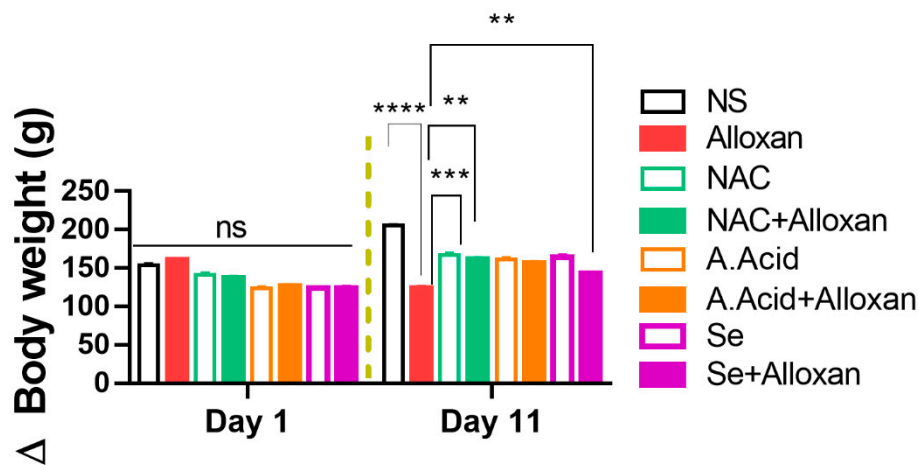

**Supplementary Figure S1:** comparison of initial and final body weight change in experimental groups. Statistical analysis was performed using Two-way ANOVA followed by Tukey's test. (\*\*):  $p < 0.01$ , (\*\*\*):  $p < 0.001$ , (\*\*\*\*):  $p < 0.0001$

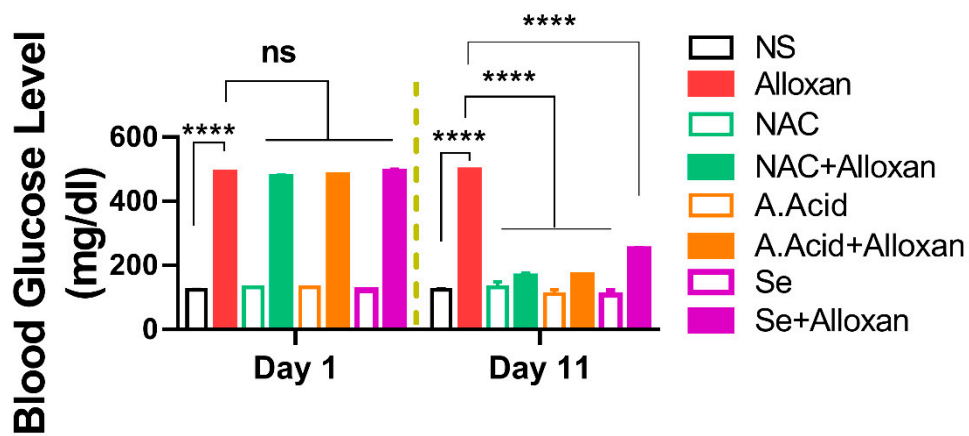

**Supplementary Figure S2:** comparison of initial and final blood glucose levels. Statistical analysis was performed using two-way ANOVA followed by Tukey's test. (\*\*\*\*):  $p < 0.0001$

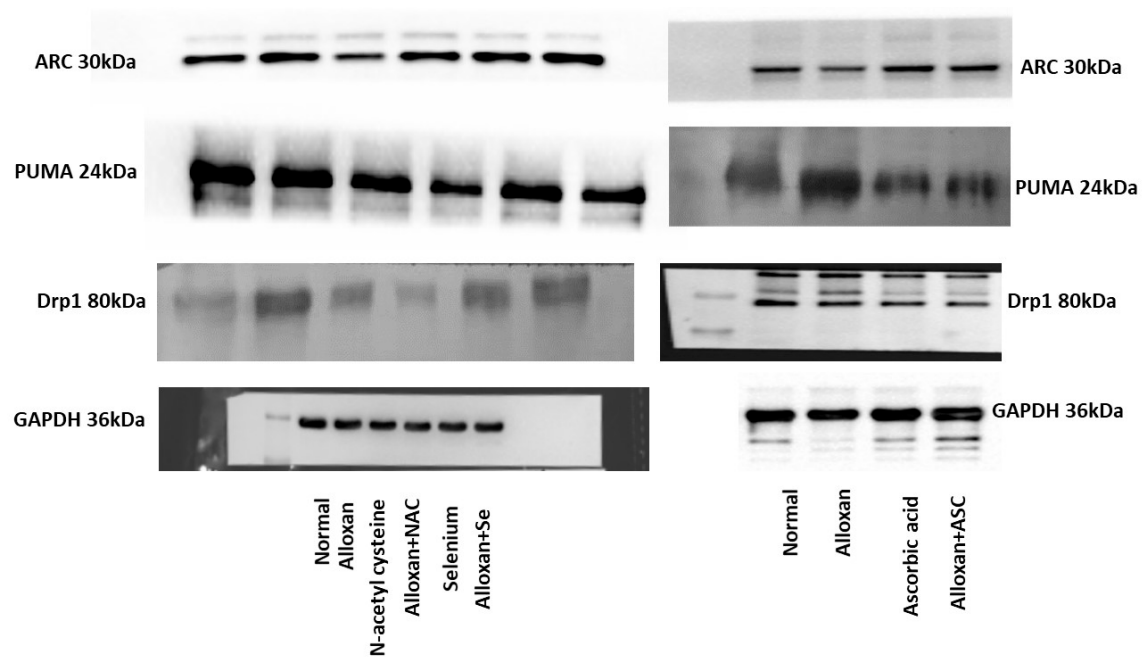

**Supplementary Figure S3:** Representative images of western blots

|              | ROS<br>(S) | ROS<br>(T) | Glucose | SOD<br>(S) | SOD<br>(T) | CAT<br>(S) | CAT<br>(T) | GSH<br>(S) | GSH<br>(T) | mRNA<br>(Drp1) | mRNA<br>(PUMA) | mRNA<br>(ARC) | Drp1<br>(Prot.) | PUMA<br>(Prot.) | ARC<br>(Prot.) | mRNA<br>(MFN-2) | mRNA<br>(PPARα) | HW/BW | HW/TL  | Cell<br>SA | Fibrosis | mRNA<br>(PGC-1α) | mRNA<br>(Bcl2) | mRNA<br>(Cyt C) |
|--------------|------------|------------|---------|------------|------------|------------|------------|------------|------------|----------------|----------------|---------------|-----------------|-----------------|----------------|-----------------|-----------------|-------|--------|------------|----------|------------------|----------------|-----------------|
| ROS (S)      |            |            |         |            |            |            |            |            |            |                |                |               |                 |                 |                |                 |                 |       |        |            |          |                  |                |                 |
| ROS (T)      | 0.99**     |            |         |            |            |            |            |            |            |                |                |               |                 |                 |                |                 |                 |       |        |            |          |                  |                |                 |
| Glucose      | 1.00       | 0.99       |         |            |            |            |            |            |            |                |                |               |                 |                 |                |                 |                 |       |        |            |          |                  |                |                 |
| SOD (S)      | -0.96      | -0.99      | -0.96   |            |            |            |            |            |            |                |                |               |                 |                 |                |                 |                 |       |        |            |          |                  |                |                 |
| SOD (T)      | -1.00      | -0.97      | -1.00*  | 0.93       |            |            |            |            |            |                |                |               |                 |                 |                |                 |                 |       |        |            |          |                  |                |                 |
| CAT (S)      | -0.97      | -1.00*     | -0.97   | 1.00*      | 0.95       |            |            |            |            |                |                |               |                 |                 |                |                 |                 |       |        |            |          |                  |                |                 |
| CAT (T)      | -1.00*     | -1.00*     | -1.00*  | 0.98       | 0.99       | 0.99       |            |            |            |                |                |               |                 |                 |                |                 |                 |       |        |            |          |                  |                |                 |
| GSH (S)      | -1.00*     | -1.00*     | -1.00   | 0.98       | 0.98       | 0.99       | 1.00**     |            |            |                |                |               |                 |                 |                |                 |                 |       |        |            |          |                  |                |                 |
| GSH (T)      | -1.00*     | -1.00*     | -1.00*  | 0.98       | 0.99       | 0.99       | 1.00**     | 1.00       |            |                |                |               |                 |                 |                |                 |                 |       |        |            |          |                  |                |                 |
| mRNA (Drp1)  | 0.99       | 0.97       | 1.00    | -0.92      | -1.00      | -0.94      | -0.98      | -0.98      | -0.98      |                |                |               |                 |                 |                |                 |                 |       |        |            |          |                  |                |                 |
| mRNA (PUMA)  | 1.00**     | 0.99       | 1.00*   | -0.97      | -0.99      | -0.98      | -1.00*     | -1.00      | -1.00      | 0.99           |                |               |                 |                 |                |                 |                 |       |        |            |          |                  |                |                 |
| mRNA(ARC)    | -0.99      | -0.95      | -0.99   | 0.90       | 1.00*      | 0.92       | 0.97       | 0.97       | 0.97       | -1.00          | -0.98          |               |                 |                 |                |                 |                 |       |        |            |          |                  |                |                 |
| Drp1 (Prot.) | 0.98       | 0.94       | 0.98    | -0.88      | -0.99      | -0.90      | -0.96      | -0.96      | -0.96      | 0.99           | 0.97           | -1.00*        |                 |                 |                |                 |                 |       |        |            |          |                  |                |                 |
| PUMA(P)      | 0.90       | 0.84       | 0.91    | -0.75      | -0.94      | -0.78      | -0.87      | -0.87      | -0.88      | 0.95           | 0.90           | -0.96         | 0.98            |                 |                |                 |                 |       |        |            |          |                  |                |                 |
| ARC(P)       | -0.93      | -0.97      | -0.92   | 1.00       | 0.89       | 0.99       | 0.95       | 0.95       | 0.95       | -0.88          | -0.93          | 0.85          | -0.82           | -0.68           |                |                 |                 |       |        |            |          |                  |                |                 |
| mRNA(MFN-2)  | -0.93      | -0.97      | -0.92   | 1.00       | 0.89       | 0.99       | 0.95       | 0.95       | 0.95       | -0.88          | -0.93          | 0.85          | -0.82           | -0.68           | 1.00*          |                 |                 |       |        |            |          |                  |                |                 |
| mRNA(PPARα)  | -1.00**    | -0.99      | -1.00** | 0.96       | 0.99       | 0.98       | 1.00*      | 1.00**     | 1.00*      | -0.99          | -1.00**        | 0.98          | -0.97           | -0.90           | 0.93           | 0.93            |                 |       |        |            |          |                  |                |                 |
| HW/BW        | 0.99       | 1.00**     | 0.99    | -0.98      | -0.98      | -0.99      | -1.00*     | -1.00*     | -1.00*     | 0.98           | 1.00*          | -0.96         | 0.95            | 0.85            | -0.96          | -0.96           | -1.00*          |       |        |            |          |                  |                |                 |
| HW/TL        | 1.00**     | 0.99       | 1.00*   | -0.95      | -1.00*     | -0.97      | -1.00*     | -0.99      | -1.00*     | 1.00*          | 1.00*          | -0.99         | 0.98            | 0.91            | -0.92          | -0.92           | -1.00*          | 0.99  |        |            |          |                  |                |                 |
| Cell SA      | 1.00*      | 0.98       | 1.00*   | -0.95      | -1.00*     | -0.97      | -0.99      | -0.99      | -1.00      | 1.00*          | 1.00*          | -0.99         | 0.98            | 0.92            | -0.91          | -0.91           | -1.00*          | 0.99  | 1.00** |            |          |                  |                |                 |
| Fibrosis     | 1.00*      | 0.98       | 1.00*   | -0.94      | -1.00*     | -0.96      | -0.99      | -0.99      | -0.99      | 1.00*          | 1.00*          | -0.99         | 0.99            | 0.93            | -0.91          | -0.91           | -1.00           | 0.99  | 1.00*  | 1.00**     |          |                  |                |                 |
| mRNA(PGC1α)  | -0.99      | -0.97      | -1.00   | 0.92       | 1.00**     | 0.94       | 0.98       | 0.98       | 0.99       | -1.00**        | -0.99          | 1.00*         | -0.99           | -0.95           | 0.88           | 0.88            | 0.99            | -0.98 | -1.00* | -1.00*     | -1.00*   |                  |                |                 |
| mRNA(Bcl2)   | -0.90      | -0.83      | -0.91   | 0.74       | 0.94       | 0.78       | 0.87       | 0.86       | 0.87       | -0.94          | -0.89          | 0.96          | -0.97           | -1.00*          | 0.67           | 0.67            | 0.89            | -0.85 | -0.91  | -0.92      | -0.92    | 0.94             |                |                 |
| mRNA (Cyt C) | 0.96       | 0.99       | 0.96    | -1.00**    | -0.93*     | -1.00      | -0.98      | -0.98      | -0.98      | 0.92           | 0.96           | -0.90         | 0.88            | 0.75            | -1.00          | -1.00           | -0.96           | 0.98  | 0.95   | 0.95       | 0.94     | -0.92            | -0.74          |                 |

**Supplementary Table S1: Correlation between diabetic, oxidative and hypertrophic or fibrotic parameters**

**The correlation scale for Pearson correlation coefficients (Pearson’s *r*) varies from -1 to +1 for all variables.**  
**+1 or closer to +1 indicate strongly positively correlated, whereas -1 or closer to -1 indicate strongly negatively correlated.**

S= serum; T= tissue, p= protein; SA= surface area; CytC = cytochrome c

Correlational analysis, significance (*p*) at

< 0.01\*\*

< 0.05\*
